# Supplementary material for: Targeting Oncofetal Fibronectin and Neuropilin-1 in solid tumors with PL2 peptide
Source: Research Square preprint supplement (doi:10.21203/rs.3.rs-5743295/v1), 2025-06-10
Supplement: Supplementary file 1 [file 4f7e8a5637c7ad83a0a89b53.pdf]

## **Supplementary Materials for**

### **Targeting Oncofetal Fibronectin and Neuropilin-1 in solid tumors with PL2 peptide**

Prakash Lingasamy<sup>1,4\*</sup>, Allan Tobi<sup>1</sup>, Kaarel Kurm<sup>1</sup>, Olav Tammik<sup>2</sup>, Tambet Teesalu<sup>1,3†</sup>

<sup>1</sup> Laboratory of Precision and Nanomedicine, Institute of Biomedicine and Translational Medicine, University of Tartu, Tartu, Estonia.

<sup>2</sup> General Surgery and Oncology Surgery Centre, North Estonia Medical Centre, Tallinn, Estonia

<sup>3</sup> Materials Research Laboratory, University of California, Santa Barbara, CA 93106, USA.

<sup>4</sup> Celvia CC AS, Tartu 50411, Estonia.

†Corresponding author:

Tambet Teesalu, PhD

Laboratory of Precision and Nanomedicine, Department of Biomedicine and Translational Medicine, University of Tartu, 50411 Tartu, Estonia. Phone: 372-5397-4441; Fax: 372-737-4268; E-mail: [tambet.teesalu@ut.ee](mailto:tambet.teesalu@ut.ee)

#### **The file includes:**

Supplementary Materials and Methods

Cloning, expression, and purification of recombinant proteins

Figure S1. Expression and purification of Fn-EDB domain.

Figure S2. Fn-EDB Biopanning Workflow.

Figure S3. Identification of tumor specific Fn-EDB homing peptides.

Figure S4. Characterization of iron oxide nanoworms (NWs).

Figure S5. Negative control cells without PL2 AgNPs treatment.

Figure S6. Biodistribution of PL2-NWs in healthy organs.

Figure S7. The PL2-NWs targetability in glioblastoma.

Figure S8. High expression of Fn-EDB receptor in human ovarian carcinoma cancer

Figure S9. Comparison of Fn-EDB binding peptides PL2 and ZD2.

## Supplementary Materials and Methods

### Cloning, expression, and purification of recombinant proteins

*Vector Construction:* The plasmids pASK75-Fn7B8 and pASK75-Fn789 were kindly provided by Prof. Dr. Arne Skerra. Gene fragments for Fn-EDB domains were amplified from pASK75-Fn7B8 plasmids using Phusion Hot Start II High-Fidelity DNA Polymerase (Thermo Fisher Scientific Inc # F-537L) with the primer pairs 5'-

CTCCTCTCATATGGAGGTGCCCCAACTCA -3' and 5'-

CAGACACTCGAGTTATCACGTTTGTGTGT -3' for the domain EDB (the underline refers to restriction sites for NdeI and XhoI). The amplified fragments were then cloned into a pET28a+ plasmid containing a N-terminal His<sub>6</sub>-tag for *E. coli* expression.

*Expression and purification of Fn-EDB:* The pET28a+ Fn-EDB plasmids were transformed into *E. coli* BL21 Rosetta 2 (DE3) pLysS strain (Novagen, #70956). Protein expression was induced by adding isopropyl β-D-1-thiogalactopyranoside (IPTG) (Sigma, # I6758) at a final concentration of 0.5 mM, and the bacteria were cultured at 18 °C for 16 hours. The bacterial cells were collected by centrifugation and lysed by sonication (Bandelin Sonopuls HD 2070, Germany). The cleared bacterial lysate was purified using HiTrap IMAC HP columns (GE Healthcare # 17-0920-05) on the ÄKTA purification system (GE Healthcare) according to the manufacturer's protocol. The eluates were analyzed by SDS-PAGE and dialyzed against PBS using 3.5 kDa cut-off 3 mL Slide-A-Lyzer Dialysis Cassettes (Thermo Scientific #66330). The protein purity, size, and de novo sequence were analyzed by SDS-PAGE and mass spectrometry.

*Single-chain antibodies:* The EDB L19 Single-Chain Variable Fragment (ScFv) sequences were obtained according to US patent applications (US8455625 B2). The scFv gBlocks Gene

sequences were synthesized and cloned into a pET28a+ vector by GenScript USA Inc. (Piscataway, NJ USA) and termed ScFv-L19-EDB. The DNA sequence was confirmed by Sanger sequencing. The *Escherichia coli* strains BL21 Rosetta™ 2 (DE3) pLysS (Novagen, #70956) were transformed with the recombinant pET28a+ ScFv-L19-EDB plasmids. The soluble ScFV antibody fragments were expressed in *E. coli* and purified from soluble cytoplasmic fractions using rProtein A GraviTrap Sepharose (GE Healthcare # 28-9852-54). The purified proteins were analyzed by 12% SDS-PAGE, and a pull-down assay further verified ScFv interaction with the target protein.

**Polyclonal antibody:** Rabbits were immunized with injections of the recombinant Fn-EDB for rabbit polyclonal antibody (RPAbs) production and purified by protein G and affinity column (LabAs Ltd, Tartu, Estonia). The rabbit PABs were validated with ELISA and Western blot, and stored at 4 °C in a storage buffer.

## Supplementary Figures

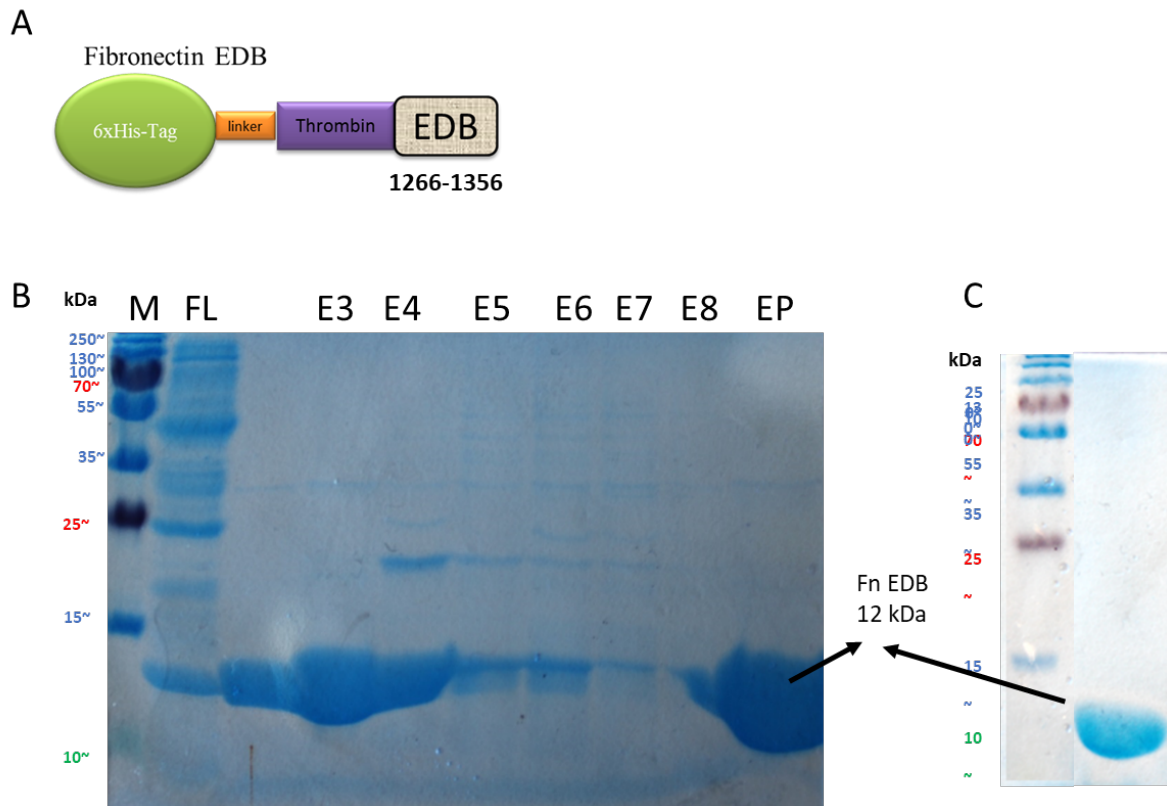



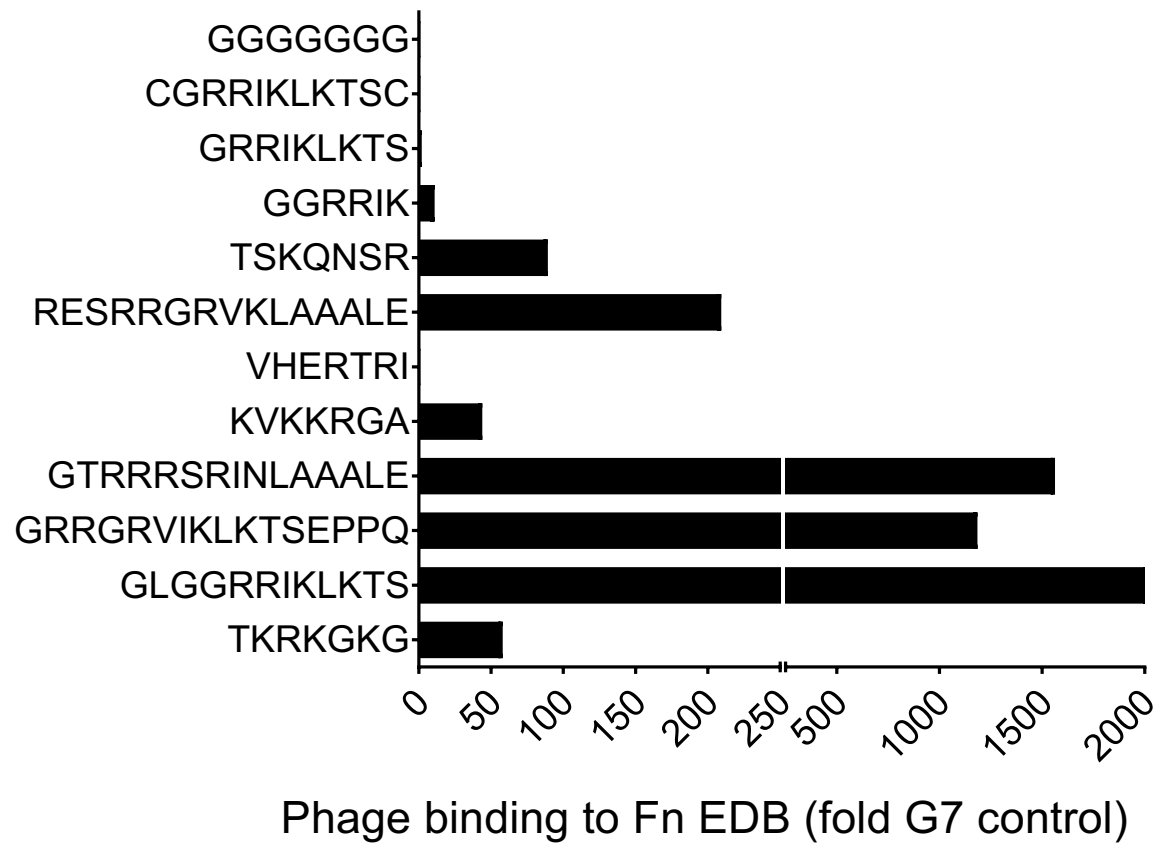

**Figure S3. Identification of tumor specific Fn-EDB homing peptides.** The bar charts depict a selection of candidate phage peptides obtained from the fifth round of Fn-EDB biopanning. The binding of peptide-phage is presented as fold over control phage G7.

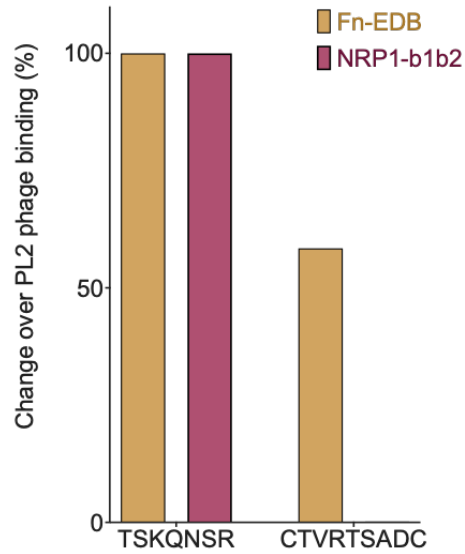

**Figure S4. Comparison of Fn-EDB binding peptides PL2 and ZD2.** The bar chart illustrates the binding of PL2 (TSKQNSR) and ZD2 (CTVRTSADC) peptide-phages to Fn-EDB and NRP-1. The Y-axis indicates the percentage change in binding relative to normalized PL2 peptide binding (set at 100%). The X-axis displays the binding of PL2 and ZD2 peptides to Fn-EDB and NRP-1.

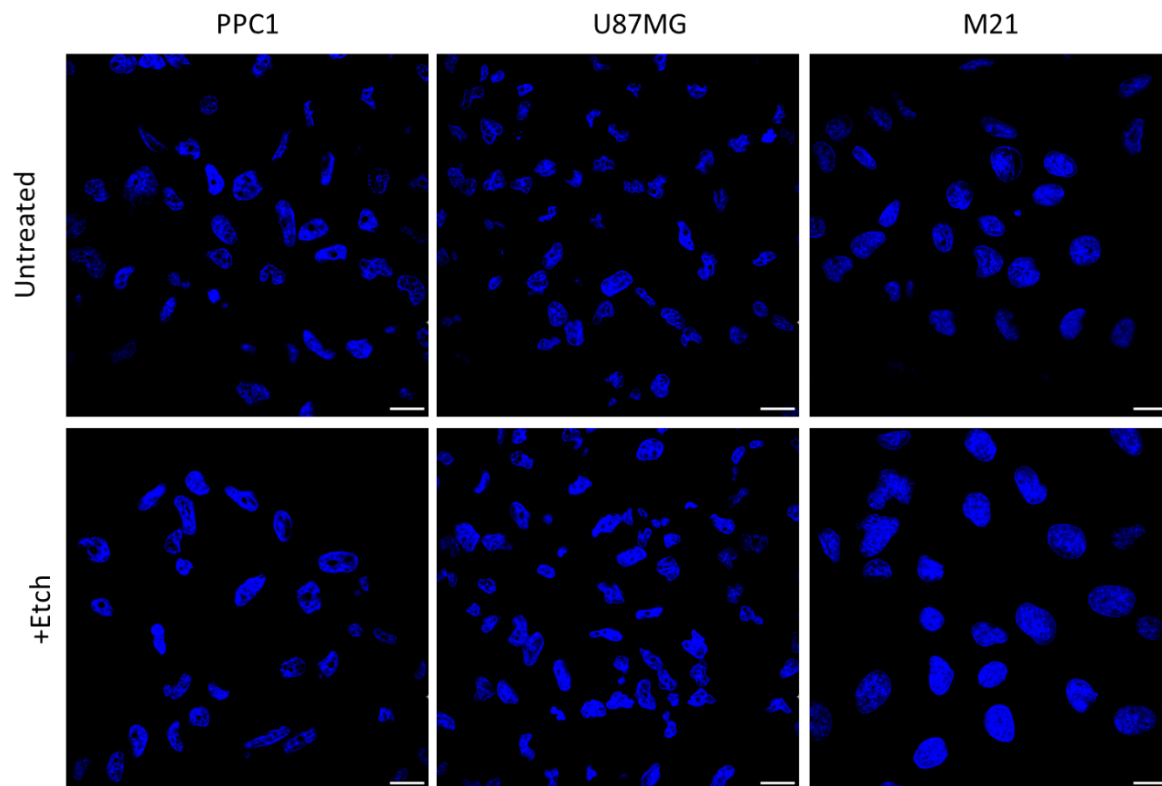

**Figure S5. Negative control for PL2 AgNPs treatment.** Confocal microscopy images of untreated and etched PPC1, U87-MG, and M21 cells show no detectable or internalized control biotin -AgNps (CF555 fluorophore dye) signal, confirming specificity of PL2 **AgNPs**. Scale bar: 20 μm.

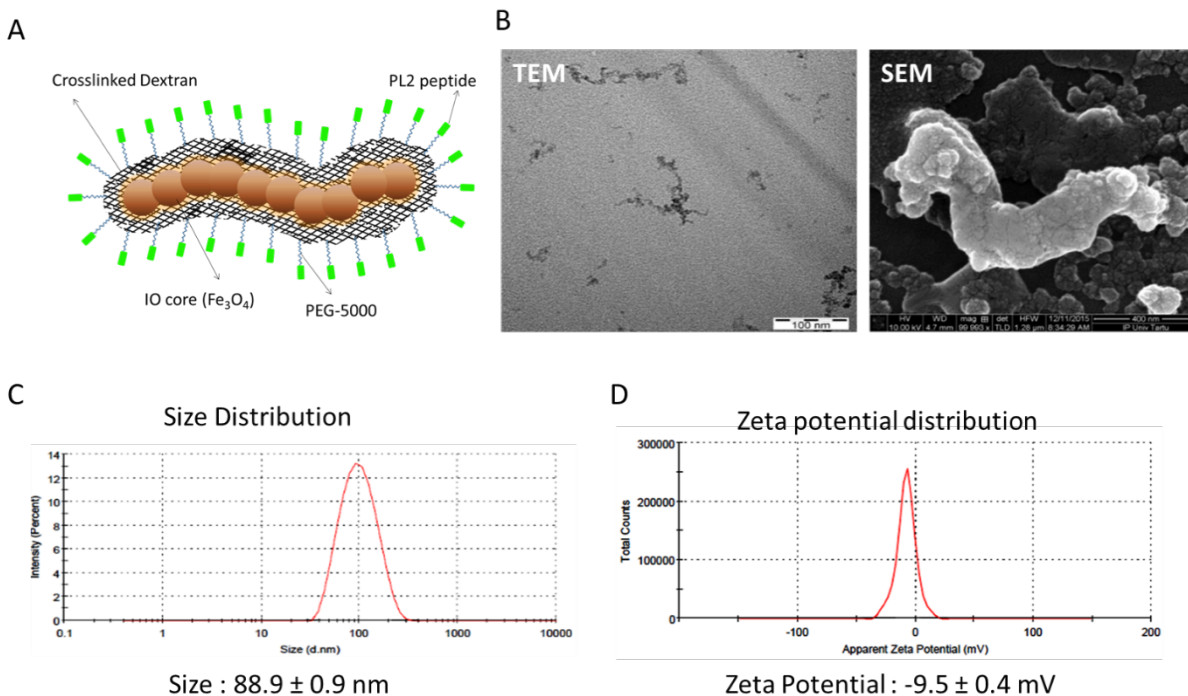

**Figure S6. Characterization of iron oxide nanoworms (NWs).** (A) Schematic representation of theranostic NWs, showing covalent coupling of FAM (carboxyfluorescein)-labeled PL2 peptide to NWs covered with PEG-5000 linker and cross-linked dextran. (B) Transmission Electron Microscopy (TEM) and Scanning Electron Microscope (SEM) images of non-functionalized NWs with increased in apparent size is attributed to the abundant contrast agent coating, scale bars of 100 nm and 400 nm, respectively. (C–D) Physicochemical properties of NWs, including zeta potential and size distribution, measured by DLS at 25 °C.



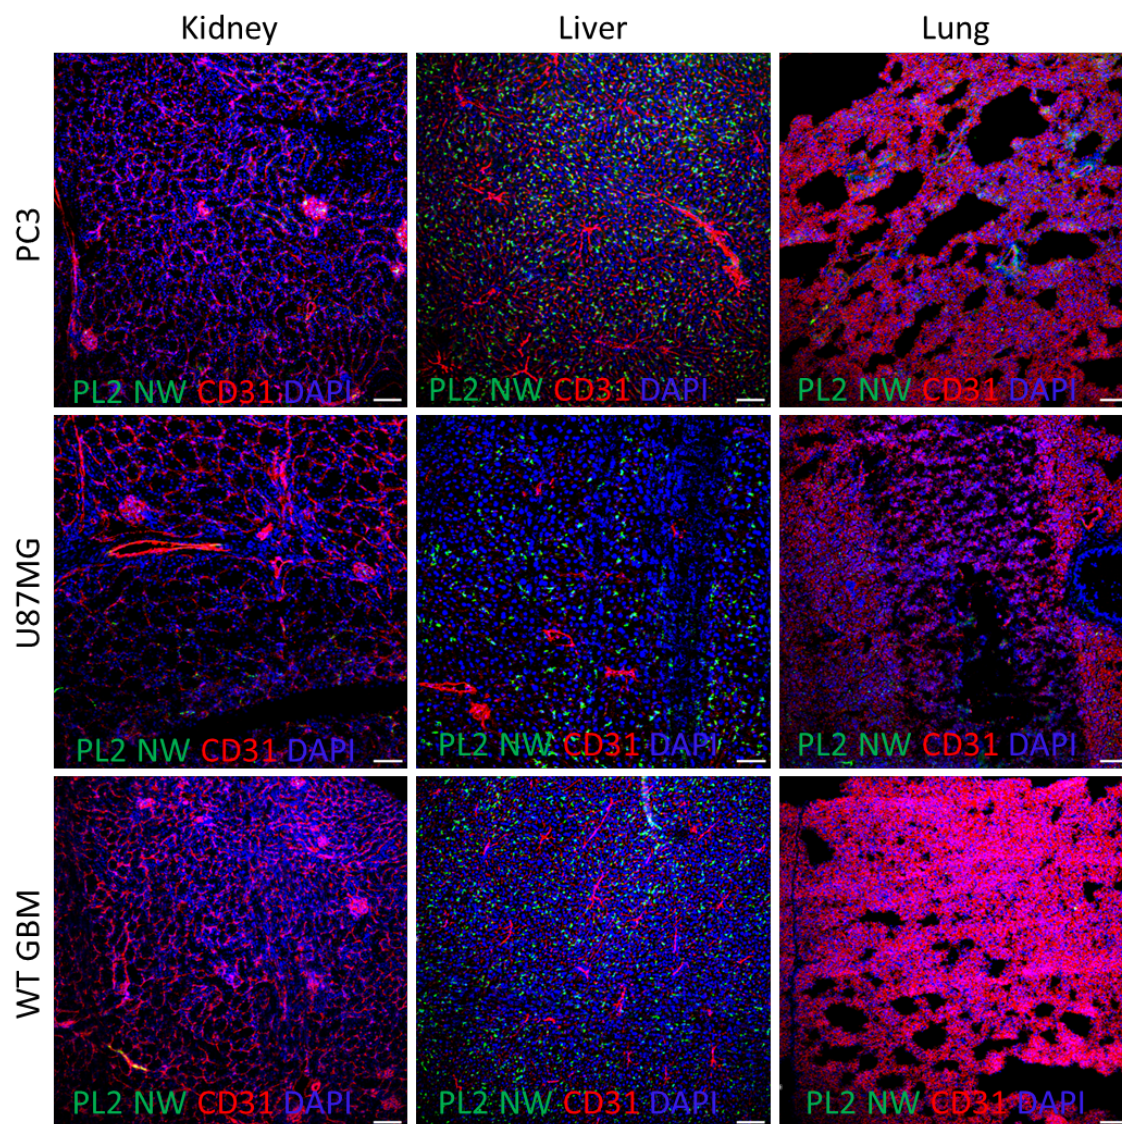

**Figure S7. Biodistribution of PL2-NWs in healthy organs.** FAM-labeled PL2 peptide-coated iron oxide NWs (or non-peptide NWs) were intravenously injected at 7.5 mg/kg into mice bearing PC3, U87-MG, and WT GBM tumors. Five hours after injection, the mice were perfused through the heart with PBS/DMEM. The collected tumors and control organs were immunostained with antibodies against FAM (green), CD31 (red), and DAPI (blue) was used to counterstain nuclei in control organ sections. N = 3; scale bars: represent 100  $\mu$ m.

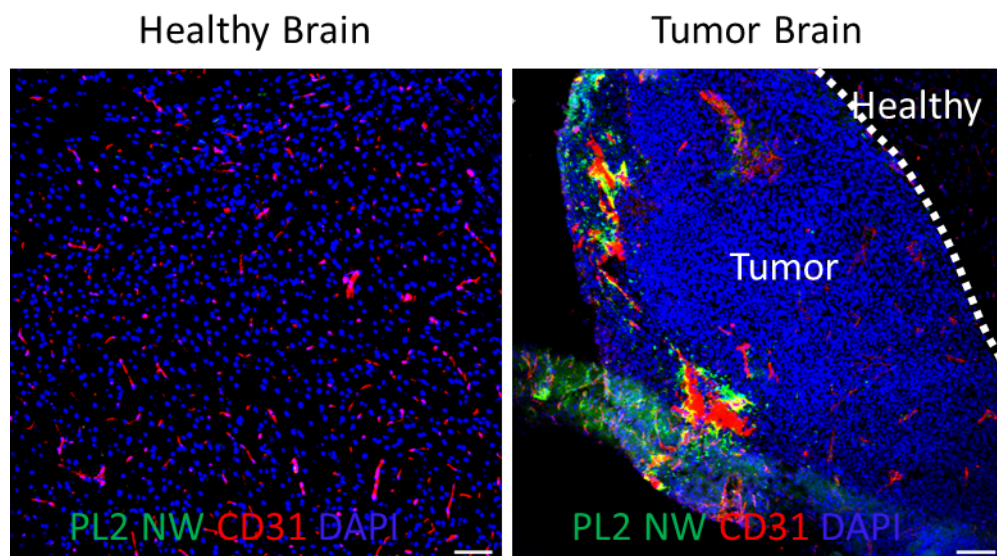

**Figure S8. The PL2-NWs targetability in glioblastoma.** FAM-labeled PL2-NWs were intravenously injected at a dose of 7.5 mg/kg into mice with WT GBM tumors and healthy mice. After 5 hours of circulation, the mice were perfused through the heart with PBS/DMEM, and the tumor and healthy parts of brain tissues were collected for immunostaining. The dashed line indicates the tumor region of the brain with high nuclei density, while the less dense nuclei area represents the healthy brain region. The anti-FAM antibody (green), anti-CD31 antibody (red), and DAPI-stained nuclei (blue) were used for staining. The study was conducted with  $n = 3$  mice, and the scale bars represent 100  $\mu\text{m}$ .

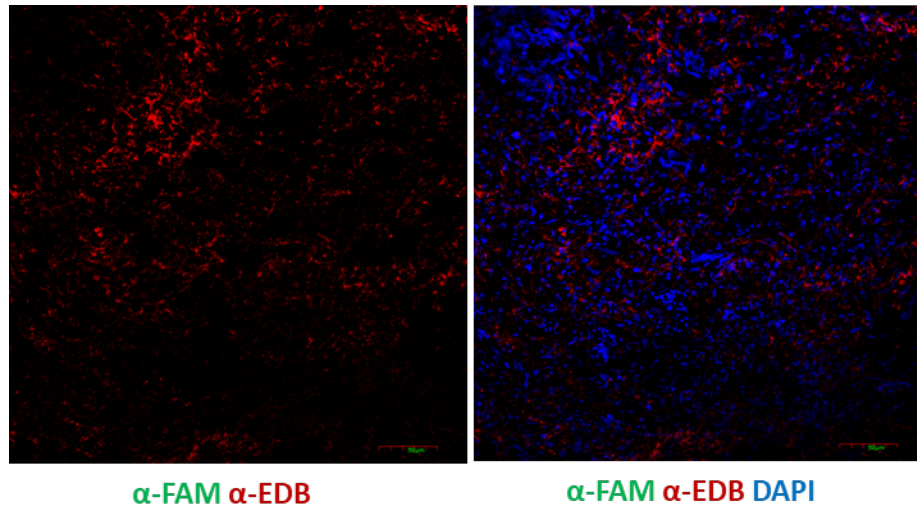

**Figure S9. High expression of Fn-EDB receptor in human ovarian carcinoma cancer.**

Confocal fluorescence imaging of fresh surgical explants of human ovarian carcinoma cancer tissues stained with anti-Fn-EDB ScFv L19 (red) reveals strong expression of the Fn-EDB receptor. The negative control staining using anti-FAM antibody (green) shows no detectable signal in the cancer tissue. DAPI (blue) was used to counterstain nuclei. N = 3; scale bars: represent 50  $\mu$ m.
